# Supplementary material
Source: publisher site journal article supplement (https://www.spandidos-publications.com/5466/downloadSupplementary)

Figure S1. Immunohistochemical analysis of samples derived from patients with breast cancer. The presentations of breast tumor tissues from patients with a (A) Ki-67 level <30%, a (B) Ki-67 level  $\geq$ 30%, (C) IHC++ and (D) IHC+++. IHC, immunohistochemistry.

A

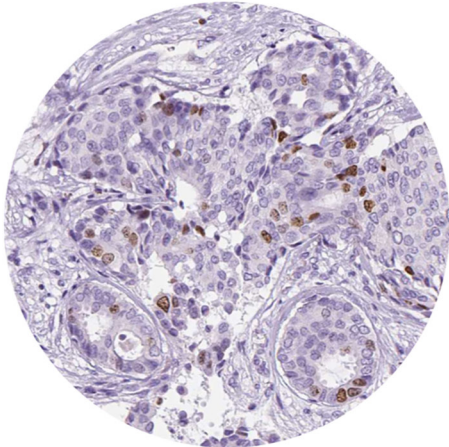

Breast tumor tissue in patients with Ki-67 level <30%

B

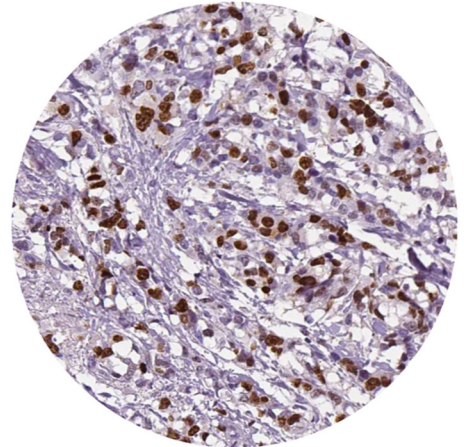

Breast tumor tissue in patients with Ki-67 level  $\geq$ 30%

C

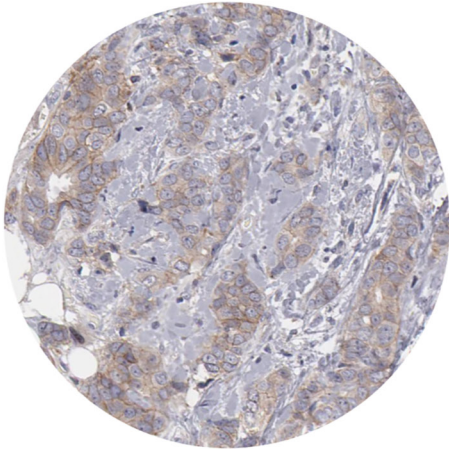

Breast tumor tissue in patients with IHC++

D

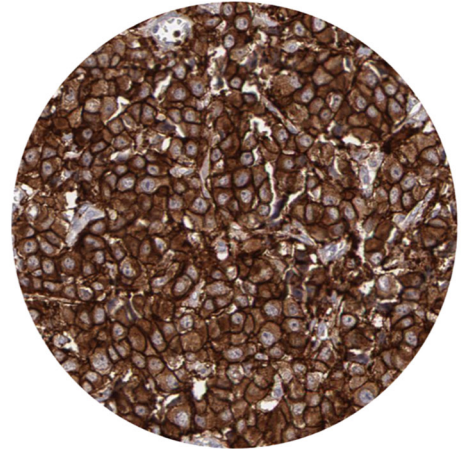

Breast tumor tissue in patients with IHC+++

Figure S2. Comparison of tpCR between neoadjuvant pyrotinib plus trastuzumab and chemotherapy vs. pyrotinib plus chemotherapy. tpCR, total pathological complete response.

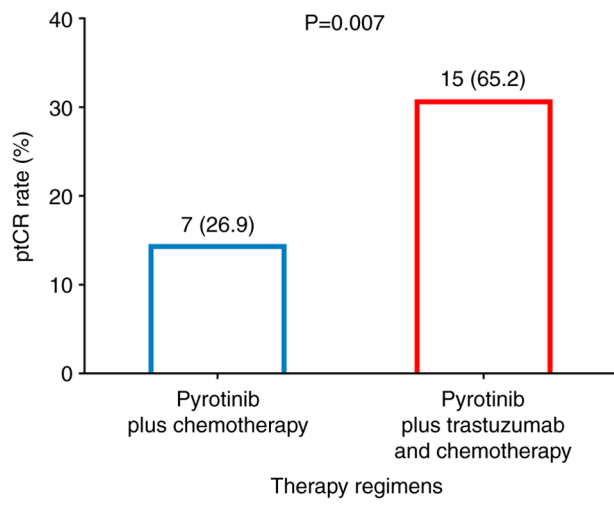

Supplement: Supplementary file 1 [file downloadSupplementary]
